# Supplementary material for: Testing Biochemistry Revisited: How In Vivo Metabolism Can Be Understood from In Vitro Enzyme Kinetics
Source: PubMed Central journal article supplement (PMC3343101; doi:10.1371/journal.pcbi.1002483), 2012-04-26
Supplement: pcbi.1002483.s001.pdf [file pcbi.1002483.s001.pdf]

**Table S1** Fixed parameters under all four conditions. Values were taken from [1].

| Parameter         | Value       | Parameter         | Value                |
|-------------------|-------------|-------------------|----------------------|
| $K_{eq,glt}$      | 1           | $K_{m,pgk,BPG}$   | 0.003 mM             |
| $P$               | 0.91        | $K_{m,pgk,P3G}$   | 0.53 mM              |
| $K_{m,hk,GLCi}$   | 0.08 mM     | $K_{m,pgk,ADP}$   | 0.2 mM               |
| $K_{m,hk,G6P}$    | 30 mM       | $K_{m,pgk,ATP}$   | 0.3 mM               |
| $K_{m,hk,ATP}$    | 0.15 mM     | $K_{eq,pgk}$      | 3200                 |
| $K_{m,hk,ADP}$    | 0.23 mM     | $K_{m,gpm,P3G}$   | 1.2 mM               |
| $K_{i,hk,T6P}$    | 0.2/0.04 mM | $K_{m,gpm,P2G}$   | 0.08 mM              |
| $K_{eq,hk}$       | 3800        | $K_{eq,gpm}$      | 0.19                 |
| $K_{m,pgi,G6P}$   | 1.4 mM      | $K_{m,eno,P2G}$   | 0.04 mM              |
| $K_{m,pgi,F6P}$   | 0.3 mM      | $K_{m,eno,PEP}$   | 0.5 mM               |
| $K_{eq,pgi}$      | 0.314       | $K_{eq,eno}$      | 6.7                  |
| $gR_{PFK}$        | 5.12        | $K_{m,pyk,PEP}$   | 0.19 mM              |
| $L_{0,PFK}$       | 0.66        | $K_{m,pyk,ADP}$   | 0.3 mM               |
| $K_{m,pfk,F6P}$   | 0.1 mM      | $K_{m,pyk,ATP}$   | 9.3 mM               |
| $K_{m,pfk,ATP}$   | 0.71 mM     | $n_{pyk}$         | 4                    |
| $C_{pfk,ATP}$     | 3           | $L_{0,pyk}$       | 60000                |
| $C_{i,pfk,ATP}$   | 100         | $K_{m,pyk,F16P}$  | 0.2 mM               |
| $C_{i,pfk,AMP}$   | 0.0845      | $K_{m,pdc,PYR}$   | 6.36 mM              |
| $C_{i,pfk,F16BP}$ | 0.397       | $NH_{PDC}$        | 1.9                  |
| $C_{i,pfk,F26BP}$ | 0.0174      | $K_{m,adh,ACALD}$ | 1.11 mM              |
| $K_{pfk,ATP}$     | 0.65 mM     | $K_{m,adh,ETOH}$  | 17 mM                |
| $K_{pfk,AMP}$     | 0.0995 mM   | $K_{m,adh,NADH}$  | 0.11 mM              |
| $K_{pfk,F16BP}$   | 0.111 mM    | $K_{m,adh,NAD}$   | 0.17 mM              |
| $K_{pfk,F26BP}$   | 0.000682 mM | $K_{i,adh,ACALD}$ | 1.1 mM               |
| $K_{m,ald,F16BP}$ | 0.3 mM      | $K_{i,adh,ETOH}$  | 90 mM                |
| $K_{m,ald,GAP}$   | 2 mM        | $K_{i,adh,NADH}$  | 0.031 mM             |
| $K_{m,ald,DHAP}$  | 2.4 mM      | $K_{i,adh,NAD}$   | 0.92 mM              |
| $K_{m,ald,GAPi}$  | 10 mM       | $K_{eq,adh}$      | $6.9 \times 10^{-5}$ |
| $K_{eq,ald}$      | 0.069       | $K_{ace}$         | 0.5                  |
| $K_{eq,tpi}$      | 0.045       |                   |                      |

## References

1. Teusink B, Passarge J, Reijenga CA, Esgalhado E, van der Weijden CC, et al. (2000) Can yeast glycolysis be understood in terms of in vitro kinetics of the constituent enzymes? Testing biochemistry. Eur J Biochem 267: 5313-5329.
