# Supplementary material for: Testing Biochemistry Revisited: How In Vivo Metabolism Can Be Understood from In Vitro Enzyme Kinetics
Source: PubMed Central journal article supplement (PMC3343101; doi:10.1371/journal.pcbi.1002483), 2012-04-26
Supplement: pcbi.1002483.s005.pdf [file pcbi.1002483.s005.pdf]

**Table S5**  $V_{max}$  values measured under ‘ $V_{max}$  optimized assay’ conditions (data were taken from [1]).

| Parameter         | D = 0.1 h <sup>-1</sup> | D = 0.1 h <sup>-1</sup> | D = 0.35 h <sup>-1</sup> | D = 0.35 h <sup>-1</sup> |                      |
|-------------------|-------------------------|-------------------------|--------------------------|--------------------------|----------------------|
|                   | Non-starved             | 4h N-starved            | Non-starved              | 4h N-starved             |                      |
| $V_{max,hk}$      | 483                     | 326                     | 552                      | 498                      | mM.min <sup>-1</sup> |
| $V_{max,pgi}$     | 1665                    | 1573                    | 1141                     | 1117                     | mM.min <sup>-1</sup> |
| $V_{max,pfk}$     | 173                     | 133                     | 98                       | 74                       | mM.min <sup>-1</sup> |
| $V_{max,ald}$     | 165                     | 122                     | 251                      | 147                      | mM.min <sup>-1</sup> |
| $V_{max,gapdh}^*$ | 296 <sup>a</sup>        | 241 <sup>a</sup>        | 198 <sup>a</sup>         | 205 <sup>a</sup>         | mM.min <sup>-1</sup> |
| $V_{max,gapdh}$   | 1646                    | 1341                    | 1101                     | 1141                     | mM.min <sup>-1</sup> |
| $V_{max,pgk}$     | 2808                    | 3063                    | 1662                     | 1364                     | mM.min <sup>-1</sup> |
| $V_{max,gpm}$     | 1493                    | n.d.                    | 1503                     | 543                      | mM.min <sup>-1</sup> |
| $V_{max,eno}$     | 264                     | n.d.                    | 285                      | n.d.                     | mM.min <sup>-1</sup> |
| $V_{max,pyk}$     | 779                     | 761                     | 965                      | 773                      | mM.min <sup>-1</sup> |
| $V_{max,pdc}$     | 153                     | 224                     | 219                      | 72                       | mM.min <sup>-1</sup> |
| $V_{max,adh}$     | 2696                    | 2025                    | 438                      | 289                      | mM.min <sup>-1</sup> |

<sup>a</sup> Forward  $V_{max}$  value of GAPDH was not measured but calculated with the Haldane relationship using the kinetic parameters from [2].

n.d.: Not determined due to practical issues.

## References

1. van Eunen K, Dool P, Canelas AB, Kiewiet J, Bouwman J, et al. (2010) Time-dependent regulation of yeast glycolysis upon nitrogen starvation depends on cell history. *IET Syst Biol* 4: 157-168.
2. Teusink B, Passarge J, Reijenga CA, Esgalhado E, van der Weijden CC, et al. (2000) Can yeast glycolysis be understood in terms of in vitro kinetics of the constituent enzymes? Testing biochemistry. *Eur J Biochem* 267: 5313-5329.
