# Supplementary material for: Testing Biochemistry Revisited: How In Vivo Metabolism Can Be Understood from In Vitro Enzyme Kinetics
Source: PubMed Central journal article supplement (PMC3343101; doi:10.1371/journal.pcbi.1002483), 2012-04-26
Supplement: pcbi.1002483.s008.pdf [file pcbi.1002483.s008.pdf]

**Table S8** Predictions from the model of yeast glycolysis for the 4h N-starved cells from the respiratory culture ( $D = 0.1 \text{ h}^{-1}$ ), compared to experimental data from [1]. Bold numbers are used for Fig. 2.

|                    | Experiment      | Model                                                          |                        |                                                                |                        |
|--------------------|-----------------|----------------------------------------------------------------|------------------------|----------------------------------------------------------------|------------------------|
|                    |                 | GAPDH parameters of<br>$D = 0.1 \text{ h}^{-1}$ , 4h N-starved |                        | GAPDH parameters of<br>$D = 0.35 \text{ h}^{-1}$ , non starved |                        |
|                    |                 | $K_{i,hk,T6P}$ 0.2 mM                                          | $K_{i,hk,T6P}$ 0.04 mM | $K_{i,hk,T6P}$ 0.2 mM                                          | $K_{i,hk,T6P}$ 0.04 mM |
| <b>Flux</b>        |                 |                                                                |                        |                                                                |                        |
| <i>HXT-HXK</i>     | $139 \pm 10$    | 97                                                             | 91                     | 97                                                             | <b>91</b>              |
| <i>PGI-ALD</i>     | $119 \pm 5$     | 101                                                            | 96                     | 101                                                            | <b>96</b>              |
| <i>GAPDH-ADH</i>   | $213 \pm 11$    | 177                                                            | 166                    | 177                                                            | <b>166</b>             |
| <b>Metabolites</b> |                 |                                                                |                        |                                                                |                        |
| <i>G6P</i>         | $4.2 \pm 0.1$   | 3.7                                                            | 3.3                    | 3.6                                                            | <b>3.2</b>             |
| <i>F6P</i>         | $0.80 \pm 0.04$ | 0.82                                                           | 0.75                   | 0.81                                                           | <b>0.73</b>            |
| <i>F16BP</i>       | $15 \pm 0$      | 1412                                                           | 949                    | 78                                                             | <b>55</b>              |
| <i>3PG+2PG</i>     | $1.1 \pm 0.0$   | 2.0                                                            | 1.6                    | 2.0                                                            | <b>1.6</b>             |
| <i>PEP</i>         | $0.12 \pm 0.00$ | 0.12                                                           | 0.11                   | 0.12                                                           | <b>0.11</b>            |
| <i>PYR</i>         | $3.5 \pm 0.3$   | 7.8                                                            | 7.2                    | 7.8                                                            | <b>7.2</b>             |

## References

1. van Eunen K, Dool P, Canelas AB, Kiewiet J, Bouwman J, et al. (2010) Time-dependent regulation of yeast glycolysis upon nitrogen starvation depends on cell history. *IET Syst Biol* 4: 157-168.
