# Supplementary material for: Testing Biochemistry Revisited: How In Vivo Metabolism Can Be Understood from In Vitro Enzyme Kinetics
Source: PubMed Central journal article supplement (PMC3343101; doi:10.1371/journal.pcbi.1002483), 2012-04-26
Supplement: pcbi.1002483.s009.pdf [file pcbi.1002483.s009.pdf]

**Table S9** Predictions from the model of yeast glycolysis for the non-starved cells from the respirofermentative culture ( $D = 0.35 \text{ h}^{-1}$ ), compared to experimental data from [1]. Bold numbers are used for Fig. 2.

|                    | Experiment      | Model                                                          |                        |
|--------------------|-----------------|----------------------------------------------------------------|------------------------|
|                    |                 | GAPDH parameters of<br>$D = 0.35 \text{ h}^{-1}$ , non starved |                        |
|                    |                 | $K_{i,hk,T6P}$ 0.2 mM                                          | $K_{i,hk,T6P}$ 0.04 mM |
| <b>Flux</b>        |                 |                                                                |                        |
| <i>HXT-HXK</i>     | $120 \pm 6$     | <b>90</b>                                                      | 54                     |
| <i>PGI-ALD</i>     | $99 \pm 6$      | <b>88</b>                                                      | 52                     |
| <i>GAPDH-ADH</i>   | $177 \pm 11$    | <b>155</b>                                                     | 82                     |
| <b>Metabolites</b> |                 |                                                                |                        |
| <i>G6P</i>         | $5.4 \pm 0.2$   | <b>1.9</b>                                                     | 0.98                   |
| <i>F6P</i>         | $1.0 \pm 0.0$   | <b>0.4</b>                                                     | 0.24                   |
| <i>F16BP</i>       | $27 \pm 2$      | <b>27</b>                                                      | 3.0                    |
| <i>3PG+2PG</i>     | $1.2 \pm 0.1$   | <b>0.7</b>                                                     | 0.32                   |
| <i>PEP</i>         | $0.11 \pm 0.01$ | <b>0.07</b>                                                    | 0.08                   |
| <i>PYR</i>         | $5.3 \pm 0.0$   | <b>5.8</b>                                                     | 3.5                    |

## References

1. van Eunen K, Dool P, Canelas AB, Kiewiet J, Bouwman J, et al. (2010) Time-dependent regulation of yeast glycolysis upon nitrogen starvation depends on cell history. *IET Syst Biol* 4: 157-168.
