# Supplementary material for: Testing Biochemistry Revisited: How In Vivo Metabolism Can Be Understood from In Vitro Enzyme Kinetics
Source: PubMed Central journal article supplement (PMC3343101; doi:10.1371/journal.pcbi.1002483), 2012-04-26
Supplement: pcbi.1002483.s010.pdf [file pcbi.1002483.s010.pdf]

**Table S10** Predictions from the model of yeast glycolysis for the 4h N-starved cells from the respirofermentative culture ( $D = 0.35 \text{ h}^{-1}$ ), compared to experimental data from [1]. Bold numbers are used for Fig. 2.

|                    | Experiment      | Model                                                           |                        |                                                                |                        |
|--------------------|-----------------|-----------------------------------------------------------------|------------------------|----------------------------------------------------------------|------------------------|
|                    |                 | GAPDH parameters of<br>$D = 0.35 \text{ h}^{-1}$ , 4h N-starved |                        | GAPDH parameters of<br>$D = 0.35 \text{ h}^{-1}$ , non starved |                        |
|                    |                 | $K_{i,hk,T6P}$ 0.2 mM                                           | $K_{i,hk,T6P}$ 0.04 mM | $K_{i,hk,T6P}$ 0.2 mM                                          | $K_{i,hk,T6P}$ 0.04 mM |
| <b>Flux</b>        |                 |                                                                 |                        |                                                                |                        |
| <i>HXT-HXK</i>     | $83 \pm 4$      | 74                                                              | 73                     | 74                                                             | <b>73</b>              |
| <i>PGI-ALD</i>     | $85 \pm 4$      | 78                                                              | 77                     | 78                                                             | <b>77</b>              |
| <i>GAPDH-ADH</i>   | $148 \pm 9$     | 135                                                             | 133                    | 134                                                            | <b>133</b>             |
| <b>Metabolites</b> |                 |                                                                 |                        |                                                                |                        |
| <i>G6P</i>         | $4.4 \pm 0.3$   | 314                                                             | 18                     | 314                                                            | <b>18</b>              |
| <i>F6P</i>         | $0.78 \pm 0.09$ | 79                                                              | 4.6                    | 79                                                             | <b>4.4</b>             |
| <i>F16BP</i>       | $16 \pm 1$      | 998                                                             | 948                    | 21                                                             | <b>20</b>              |
| <i>3PG+2PG</i>     | $1.1 \pm 0.0$   | 1.9                                                             | 1.8                    | 1.9                                                            | <b>1.8</b>             |
| <i>PEP</i>         | $0.12 \pm 0.00$ | 0.11                                                            | 0.10                   | 0.11                                                           | <b>0.10</b>            |
| <i>PYR</i>         | $3.9 \pm 0.3$   | 12                                                              | 12                     | 12                                                             | <b>12</b>              |

## References

1. van Eunen K, Dool P, Canelas AB, Kiewiet J, Bouwman J, et al. (2010) Time-dependent regulation of yeast glycolysis upon nitrogen starvation depends on cell history. *IET Syst Biol* 4: 157-168.
