# Supplementary material for: Testing Biochemistry Revisited: How In Vivo Metabolism Can Be Understood from In Vitro Enzyme Kinetics
Source: PubMed Central journal article supplement (PMC3343101; doi:10.1371/journal.pcbi.1002483), 2012-04-26
Supplement: pcbi.1002483.s011.pdf [file pcbi.1002483.s011.pdf]

**Table S11** Response coefficients of the concentration of F16BP towards the model parameters  $p$ . The

response coefficient  $R_{p_i}^j = \frac{d \ln[F16BP]}{d \ln p_i} = \frac{d[F16BP]}{dp_i} \cdot \frac{p_i}{[F16BP]} \approx \frac{[F16BP]_{+h} - [F16BP]_{-h}}{2 \cdot h} \cdot \frac{p_{i,0}}{[F16BP]_0}$  was

approximated by either increasing or decreasing the parameter of interest by  $h$ , which was 1%. This was done for the model versions corresponding to figure 2 in the main text.

| Parameter          | D = 0.1 h <sup>-1</sup> | D = 0.1 h <sup>-1</sup> | D = 0.35 h <sup>-1</sup> | D = 0.1 h <sup>-1</sup> |
|--------------------|-------------------------|-------------------------|--------------------------|-------------------------|
|                    | Non-starved             | 4h N-starved            | Non-starved              | 4h N-starved            |
| $V_{max,glc}$      | 2.16                    | 5.25                    | 2.54                     | 3.01                    |
| $K_{m,glc,GLCo}$   | -0.07                   | -0.95                   | -0.05                    | -0.40                   |
| $K_{m,glc,GLCi}$   | 1.27                    | 0.34                    | 1.36                     | 0.33                    |
| $K_{eq,glc}$       | 0.11                    | 0.09                    | 0.06                     | 0.06                    |
| $V_{max,hk}$       | 2.15                    | 0.86                    | 2.48                     | 0.65                    |
| $K_{m,hk,GLCi}$    | -1.39                   | -0.43                   | -1.42                    | -0.39                   |
| $K_{m,hk,G6P}$     | 0.00                    | 0.00                    | 0.00                     | 0.01                    |
| $K_{i,hk,T6P}$     | 1.36                    | 0.38                    | 1.33                     | 0.35                    |
| $K_{m,hk,ATP}$     | -0.30                   | -0.13                   | -0.47                    | -0.10                   |
| $K_{m,hk,ADP}$     | 0.24                    | 0.10                    | 0.40                     | 0.08                    |
| $K_{eq,hk}$        | 0.00                    | 0.00                    | 0.00                     | 0.00                    |
| $V_{max,pgi}$      | 0.00                    | 0.00                    | 0.00                     | 0.00                    |
| $K_{m,pgi,G6P}$    | 0.00                    | 0.00                    | 0.00                     | 0.00                    |
| $K_{m,pgi,F6P}$    | 0.00                    | 0.00                    | 0.00                     | 0.00                    |
| $K_{eq,pgi}$       | 0.00                    | 0.00                    | 0.00                     | 0.01                    |
| $K_{tre1}$         | 0.11                    | 0.25                    | 0.00                     | 0.17                    |
| $K_{tre2}$         | 0.00                    | 0.00                    | -0.11                    | 0.00                    |
| $V_{max,pfk}$      | 0.00                    | 0.01                    | 0.01                     | 1.21                    |
| $gR_{pfk}$         | 0.00                    | 0.00                    | 0.00                     | 0.17                    |
| $L_{0,pfk}$        | 0.00                    | 0.00                    | 0.00                     | -0.01                   |
| $K_{m,pfk,F6P}$    | 0.00                    | 0.00                    | 0.00                     | -0.01                   |
| $K_{m,pfk,ATP}$    | 0.00                    | 0.00                    | 0.00                     | 0.00                    |
| $C_{pfk,ATP}$      | 0.00                    | 0.00                    | 0.00                     | -0.01                   |
| $K_{pfk,AMP}$      | 0.00                    | 0.00                    | 0.00                     | -0.01                   |
| $C_{pfk,AMP}$      | 0.00                    | 0.00                    | 0.00                     | 0.00                    |
| $K_{i,pfk,ATP}$    | 0.00                    | 0.00                    | 0.00                     | 0.00                    |
| $C_{i,pfk,ATP}$    | 0.00                    | 0.00                    | 0.00                     | -0.01                   |
| $K_{pfk,F26BP}$    | 0.00                    | 0.00                    | 0.00                     | 0.00                    |
| $C_{pfk,F26BP}$    | 0.00                    | 0.00                    | 0.00                     | 0.00                    |
| $K_{pfk,F16BP}$    | 0.00                    | 0.00                    | 0.00                     | 0.00                    |
| $C_{pfk,F16BP}$    | 0.00                    | 0.00                    | 0.00                     | -0.01                   |
| $K_{eq,tpi}$       | -0.98                   | -0.99                   | -0.99                    | -0.98                   |
| $V_{max,ald}$      | -0.94                   | -1.82                   | -0.85                    | -0.99                   |
| $K_{m,ald,F16P}$   | 0.05                    | 0.03                    | 0.03                     | 0.04                    |
| $K_{m,ald,GAP}$    | 0.00                    | 0.00                    | 0.00                     | 0.00                    |
| $K_{m,ald,DHAP}$   | -0.03                   | -0.02                   | -0.02                    | -0.02                   |
| $K_{m,ald,GAPi}$   | -0.01                   | -0.04                   | -0.02                    | -0.02                   |
| $K_{eq,ald}$       | -0.95                   | -0.97                   | -0.97                    | -0.96                   |
| $K_{gly}$          | -0.46                   | -0.68                   | -0.60                    | -0.63                   |
| $V_{max,gapdh}^*$  | -2.62                   | -3.24                   | -3.04                    | -2.83                   |
| $V_{max,gapdh}$    | 0.01                    | 0.01                    | 0.00                     | 0.01                    |
| $K_{m,gapdh,GAP}$  | 1.94                    | 2.00                    | 1.98                     | 1.96                    |
| $K_{m,gapdh,BPG}$  | -0.02                   | -0.02                   | -0.01                    | -0.02                   |
| $K_{m,gapdh,NAD}$  | 1.86                    | 2.31                    | 2.14                     | 1.99                    |
| $K_{m,gapdh,NADH}$ | -0.50                   | -0.64                   | -0.53                    | -0.48                   |
| $C_{gapdh}$        | -2.61                   | -3.23                   | -3.04                    | -2.82                   |
| $NADt$             | -1.50                   | -1.85                   | -1.76                    | -1.64                   |
| $V_{max,pgk}$      | 0.00                    | 0.00                    | 0.00                     | 0.00                    |

|                                |       |       |       |       |
|--------------------------------|-------|-------|-------|-------|
| <i>K<sub>m,pgk,BPG</sub></i>   | 0.00  | 0.00  | 0.00  | 0.00  |
| <i>K<sub>m,pgk,P3G</sub></i>   | 0.00  | 0.00  | 0.00  | 0.00  |
| <i>K<sub>m,pgk,ADP</sub></i>   | 0.00  | 0.00  | 0.00  | 0.00  |
| <i>K<sub>m,pgk,ATP</sub></i>   | 0.00  | 0.00  | 0.00  | 0.00  |
| <i>K<sub>eq,pgk</sub></i>      | -0.02 | -0.02 | -0.01 | -0.02 |
| <i>V<sub>max,gpm</sub></i>     | -0.01 | -0.02 | 0.00  | -0.02 |
| <i>K<sub>m,gpm,P3G</sub></i>   | 0.01  | 0.01  | 0.00  | 0.01  |
| <i>K<sub>m,gpm,P2G</sub></i>   | 0.00  | -0.01 | 0.00  | -0.01 |
| <i>K<sub>eq,gpm</sub></i>      | -0.01 | -0.01 | 0.00  | -0.01 |
| <i>V<sub>max,eno</sub></i>     | -0.01 | -0.03 | 0.00  | -0.02 |
| <i>K<sub>m,eno,P2G</sub></i>   | 0.01  | 0.01  | 0.00  | 0.01  |
| <i>K<sub>m,eno,PEP</sub></i>   | 0.00  | 0.00  | 0.00  | 0.00  |
| <i>K<sub>eq,eno</sub></i>      | 0.00  | -0.01 | 0.00  | -0.01 |
| <i>V<sub>max,pyk</sub></i>     | -0.01 | -0.01 | 0.00  | -0.01 |
| <i>K<sub>m,pyk,PEP</sub></i>   | 0.01  | 0.01  | 0.00  | 0.01  |
| <i>K<sub>m,pyk,ADP</sub></i>   | 0.00  | 0.00  | 0.00  | 0.00  |
| <i>K<sub>m,pyk,ATP</sub></i>   | 0.00  | 0.00  | 0.00  | 0.00  |
| <i>n<sub>10,pyk</sub></i>      | 0.00  | 0.00  | 0.00  | 0.00  |
| <i>L<sub>10,pyk</sub></i>      | 0.00  | 0.00  | 0.00  | 0.00  |
| <i>K<sub>m,pyk,F16P</sub></i>  | 0.00  | 0.00  | 0.00  | 0.00  |
| <i>V<sub>max,fdc</sub></i>     | 0.00  | 0.00  | 0.00  | 0.00  |
| <i>K<sub>m,fdc,PYR</sub></i>   | 0.00  | 0.00  | 0.00  | 0.00  |
| <i>NH<sub>fdc</sub></i>        | 0.00  | 0.00  | 0.00  | 0.00  |
| <i>V<sub>max,adh</sub></i>     | -0.46 | -0.62 | -0.50 | -0.46 |
| <i>K<sub>m,adh,ACALD</sub></i> | -0.35 | -0.49 | -0.38 | -0.35 |
| <i>K<sub>m,adh,ETOH</sub></i>  | 0.36  | 0.49  | 0.39  | 0.35  |
| <i>K<sub>m,adh,NADH</sub></i>  | 0.35  | 0.48  | 0.37  | 0.35  |
| <i>K<sub>m,adh,NAD</sub></i>   | 0.00  | 0.00  | 0.00  | 0.00  |
| <i>K<sub>i,adh,ACALD</sub></i> | -0.09 | -0.13 | -0.10 | -0.09 |
| <i>K<sub>i,adh,ETOH</sub></i>  | 0.00  | 0.00  | 0.00  | 0.00  |
| <i>K<sub>i,adh,NADH</sub></i>  | -0.35 | -0.49 | -0.38 | -0.35 |
| <i>K<sub>i,adh,NAD</sub></i>   | 0.13  | 0.18  | 0.14  | 0.13  |
| <i>K<sub>eq,adh</sub></i>      | 0.50  | 0.65  | 0.53  | 0.48  |
| <i>K<sub>suc</sub></i>         | 0.02  | 0.00  | 0.02  | 0.00  |
| <i>K<sub>ace</sub></i>         | 0.06  | 0.04  | 0.05  | 0.04  |
| <i>ATP</i>                     | 0.32  | 0.15  | 0.47  | 0.12  |
| <i>ADP</i>                     | -0.26 | -0.12 | -0.40 | -0.11 |
| <i>AMP</i>                     | 0.00  | 0.00  | 0.00  | 0.01  |
| <i>GLCo</i>                    | 0.19  | 1.04  | 0.11  | 0.45  |
| <i>CO2</i>                     | 0.00  | 0.00  | 0.00  | 0.00  |
| <i>ETOH</i>                    | 0.14  | 0.16  | 0.15  | 0.13  |
| <i>T6P</i>                     | -1.36 | -0.38 | -1.34 | -0.35 |
| <i>TREH</i>                    | 0.00  | 0.00  | 0.00  | 0.00  |
| <i>F26BP</i>                   | 0.00  | 0.00  | 0.00  | 0.00  |
| <i>GLY</i>                     | 0.00  | 0.00  | 0.00  | 0.00  |
| <i>ACE</i>                     | 0.00  | 0.00  | 0.00  | 0.00  |

---
