# Supplementary material for: Testing Biochemistry Revisited: How In Vivo Metabolism Can Be Understood from In Vitro Enzyme Kinetics
Source: PubMed Central journal article supplement (PMC3343101; doi:10.1371/journal.pcbi.1002483), 2012-04-26
Supplement: pcbi.1002483.s016.pdf [file pcbi.1002483.s016.pdf]

**Table S16** Comparison of the regulation coefficients presented in [1] ( $V_{max}$  values measured under enzyme-optimized conditions) and those re-calculated with the  $V_{max}$  values measured under *in vivo*-like conditions, but using the same changes in flux. Glucose transport was assessed in whole cells in growth medium, hence only under physiological conditions. The hierarchical regulation coefficient  $\rho_h$  reflects regulation of the flux by altered  $V_{max}$  through the entire gene-expression cascade. The metabolic regulation coefficient  $\rho_m$  reflects regulation through interaction of the enzyme with altered metabolite concentrations. For theory see [2,3].

| Enzyme       | Chapter 3<br>Enzyme-optimized $V_{max}$ values |     |          |                          |      |          | <i>In vivo</i> -like $V_{max}$ values |      |          |                          |     |          |
|--------------|------------------------------------------------|-----|----------|--------------------------|------|----------|---------------------------------------|------|----------|--------------------------|-----|----------|
|              | D = 0.1 h <sup>-1</sup>                        |     |          | D = 0.35 h <sup>-1</sup> |      |          | D = 0.1 h <sup>-1</sup>               |      |          | D = 0.35 h <sup>-1</sup> |     |          |
|              | $\rho_h$                                       | SEM | $\rho_m$ | $\rho_h$                 | SEM  | $\rho_m$ | $\rho_h$                              | SEM  | $\rho_m$ | $\rho_h$                 | SEM | $\rho_m$ |
| <i>HXT</i>   |                                                |     |          |                          |      |          | -1.5                                  |      | 2.5      | 2.0                      |     | -1.0     |
| <i>HXK</i>   | -1.0                                           | 0.3 | 2.0      | 0.3                      | 0.2  | 0.7      | -0.6                                  | 0.0  | 1.6      | 0.3                      | 0.1 | 0.7      |
| <i>PGI</i>   | -0.2                                           | 0.2 | 1.2      | 0.1                      | 0.3  | 0.9      | 0.1                                   | 0.1  | 0.9      | 0.4                      | 0.1 | 0.6      |
| <i>PFK</i>   | -0.7                                           | 0.2 | 1.7      | 1.9                      | 0.3  | -0.9     | -0.7                                  | 0.01 | 1.7      | 4.4                      | 1.1 | -3.4     |
| <i>ALD</i>   | -0.8                                           | 0.2 | 1.8      | 3.5                      | 0.8  | -2.5     | -0.6                                  | 0.5  | 1.6      | 1.4                      | 0.2 | -0.4     |
| <i>GAPDH</i> | -0.5                                           | 0.2 | 1.5      | -0.2                     | -0.4 | 1.2      | -0.5                                  | 0.3  | 1.5      | 0.3                      | 0.5 | 0.7      |
| <i>PGK</i>   | 0.2                                            | 0.3 | 0.8      | 1.1                      | 0.3  | -0.1     | 0.3                                   | 0.1  | 0.7      | 1.2                      | 0.0 | -0.2     |
| <i>PYK</i>   | -0.1                                           | 0.2 | 1.1      | 1.3                      | 0.1  | -0.3     | 0.4                                   | 0.2  | 0.6      | 2.0                      | 0.2 | -1.0     |
| <i>PDC</i>   | 1.2                                            | 0.3 | -0.2     | 6.6                      | 1.9  | -5.6     | 0.5                                   | 0.1  | 0.5      | 3.8                      | 0.1 | -2.8     |
| <i>ADH</i>   | -0.7                                           | 0.1 | 1.7      | 2.3                      | 0.4  | -1.3     | -0.2                                  | 0.0  | 1.2      | 0.8                      | 0.1 | 0.2      |

### References

1. van Eunen K, Dool P, Canelas AB, Kiewiet J, Bouwman J, et al. (2010) Time-dependent regulation of yeast glycolysis upon nitrogen starvation depends on cell history. *IET Syst Biol* 4: 157-168.
2. Rossell S, van der Weijden CC, Lindenberg A, van Tuijl A, Francke C, et al. (2006) Unraveling the complexity of flux regulation: a new method demonstrated for nutrient starvation in *Saccharomyces cerevisiae*. *Proc Natl Acad Sci U S A* 103: 2166-2171.
3. ter Kuile BH, Westerhoff HV (2001) Transcriptome meets metabolome: hierarchical and metabolic regulation of the glycolytic pathway. *FEBS Lett* 500: 169-171.
