# Supplementary material for: Testing Biochemistry Revisited: How In Vivo Metabolism Can Be Understood from In Vitro Enzyme Kinetics
Source: PLoS Comput Biol. 2012 Apr 26;8(4):e1002483. doi: 10.1371/journal.pcbi.1002483 (PMC3343101; doi:10.1371/journal.pcbi.1002483)
Supplement: Table S2 — Concentrations of metabolites fixed under all four conditions. (PDF) [file pcbi.1002483.s002.pdf]

**Table S2** Concentrations of metabolites fixed under all four conditions.

| <b>Metabolite</b>      | <b>Concentration<br/>(mM)</b> |
|------------------------|-------------------------------|
| <i>GLC<sub>o</sub></i> | 50                            |
| <i>ETOH</i>            | 25                            |
| <i>NAD<sup>t</sup></i> | 1.59                          |
