# Supplementary material for: Testing Biochemistry Revisited: How In Vivo Metabolism Can Be Understood from In Vitro Enzyme Kinetics
Source: PLoS Comput Biol. 2012 Apr 26;8(4):e1002483. doi: 10.1371/journal.pcbi.1002483 (PMC3343101; doi:10.1371/journal.pcbi.1002483)
Supplement: Table S6 — Parameter used to simulate the upshift of the extracellular glucose concentration. (PDF) [file pcbi.1002483.s006.pdf]

**Table S6** Parameter used to simulate the upshift of the extracellular glucose concentration.

| Parameter              | Aerobic glucose-limited chemostat ( $D = 0.1 \text{ h}^{-1}$ ) |                                   |
|------------------------|----------------------------------------------------------------|-----------------------------------|
| <i>Enzyme kinetics</i> |                                                                |                                   |
| $V_{max,glc}$          | 160                                                            | $\text{mM} \cdot \text{min}^{-1}$ |
| $K_{m,glc,GLC}$        | 1                                                              | mM                                |
| $V_{max,hk}$           | 213                                                            | $\text{mM} \cdot \text{min}^{-1}$ |
| $K_{i,hk,T6P}$         | 0.04                                                           | mM                                |
| $V_{max,pgi}$          | 787                                                            | $\text{mM} \cdot \text{min}^{-1}$ |
| $V_{max,pfk}$          | 213                                                            | $\text{mM} \cdot \text{min}^{-1}$ |
| $V_{max,ald}$          | 310                                                            | $\text{mM} \cdot \text{min}^{-1}$ |
| $V_{max,gapdh}^+$      | 1300                                                           | $\text{mM} \cdot \text{min}^{-1}$ |
| $V_{max,gapdh}$        | 853                                                            | $\text{mM} \cdot \text{min}^{-1}$ |
| $K_{m,gapdh,GAP}$      | 0.21                                                           | mM;<br>Taken from [1]             |
| $K_{m,gapdh,NAD}$      | 2.8                                                            | mM                                |
| $K_{m,gapdh,NADH}$     | 0.06                                                           | mM;<br>Taken from [1]             |
| $K_{m,gapdh,BPG}$      | 0.036                                                          | mM                                |
| $K_{eq,gapdh}$         | 0.0056                                                         | Taken from [1]                    |
| $V_{max,pgk}$          | 2512                                                           | $\text{mM} \cdot \text{min}^{-1}$ |
| $V_{max,gpm}$          | 856                                                            | $\text{mM} \cdot \text{min}^{-1}$ |
| $V_{max,eno}$          | 357                                                            | $\text{mM} \cdot \text{min}^{-1}$ |
| $V_{max,pyk}$          | 820                                                            | $\text{mM} \cdot \text{min}^{-1}$ |
| $V_{max,pdc}$          | 395                                                            | $\text{mM} \cdot \text{min}^{-1}$ |
| $V_{max,adh}$          | 932                                                            | $\text{mM} \cdot \text{min}^{-1}$ |
| <i>Regulators</i>      |                                                                |                                   |
| ATP                    | 3                                                              | mM                                |
| ADP                    | 1                                                              | mM                                |
| AMP                    | 0.3                                                            | mM                                |
| F26BP                  | 0.014                                                          | mM                                |
| T6P                    | 0.2                                                            | mM                                |

**References**

1. Teusink B, Passarge J, Reijenga CA, Esgalhado E, van der Weijden CC, et al. (2000) Can yeast glycolysis be understood in terms of in vitro kinetics of the constituent enzymes? Testing biochemistry. Eur J Biochem 267: 5313-5329.
