# Supplementary material for: Testing Biochemistry Revisited: How In Vivo Metabolism Can Be Understood from In Vitro Enzyme Kinetics
Source: PLoS Comput Biol. 2012 Apr 26;8(4):e1002483. doi: 10.1371/journal.pcbi.1002483 (PMC3343101; doi:10.1371/journal.pcbi.1002483)
Supplement: Table S7 — Predictions from the model of yeast glycolysis for the non-starved cells from the respiratory culture (D = 0.1 h−1), compared to experimental data from [23] . (PDF) [file pcbi.1002483.s007.pdf]

**Table S7** Predictions from the model of yeast glycolysis for the non-starved cells from the respiratory culture ( $D = 0.1 \text{ h}^{-1}$ ), compared to experimental data from [1]. Bold numbers are used for Fig. 2.

| Experiment         |             | Model                                                        |                                     |                                    |                                                               |  |             |
|--------------------|-------------|--------------------------------------------------------------|-------------------------------------|------------------------------------|---------------------------------------------------------------|--|-------------|
|                    |             | GAPDH parameters of<br>D = 0.1 h <sup>-1</sup> , non starved |                                     |                                    | GAPDH parameters of<br>D = 0.35 h <sup>-1</sup> , non starved |  |             |
|                    |             | <i>K<sub>i,hk,T6P</sub></i> 0.2 mM                           | <i>K<sub>i,hk,T6P</sub></i> 0.04 mM | <i>K<sub>i,hk,T6P</sub></i> 0.2 mM | <i>K<sub>i,hk,T6P</sub></i> 0.04 mM                           |  |             |
| <b>Flux</b>        |             |                                                              |                                     |                                    |                                                               |  |             |
| <i>HXT-HXK</i>     | 94 ± 4      | 127                                                          | 84                                  | 127                                |                                                               |  | <b>84</b>   |
| <i>PGI-ALD</i>     | 82 ± 3      | 131                                                          | 88                                  | 131                                |                                                               |  | <b>88</b>   |
| <i>GAPDH-ADH</i>   | 147 ± 4     | 245                                                          | 158                                 | 245                                |                                                               |  | <b>158</b>  |
| <b>Metabolites</b> |             |                                                              |                                     |                                    |                                                               |  |             |
| <i>G6P</i>         | 3.8 ± 0.1   | 3.9                                                          | 2.0                                 | 3.8                                |                                                               |  | <b>1.8</b>  |
| <i>F6P</i>         | 0.74 ± 0.01 | 0.77                                                         | 0.45                                | 0.76                               |                                                               |  | <b>0.39</b> |
| <i>F16BP</i>       | 12 ± 1      | 5801                                                         | 495                                 | 122                                |                                                               |  | <b>12</b>   |
| <i>3PG+2PG</i>     | 0.78 ± 0.02 | 4.1                                                          | 1.0                                 | 4.1                                |                                                               |  | <b>1.0</b>  |
| <i>PEP</i>         | 0.10 ± 0.01 | 0.25                                                         | 0.11                                | 0.25                               |                                                               |  | <b>0.11</b> |
| <i>PYR</i>         | 2.8 ± 0.6   | 53                                                           | 8.4                                 | 53                                 |                                                               |  | <b>8.4</b>  |

## References

1. van Eunen K, Dool P, Canelas AB, Kiewiet J, Bouwman J, et al. (2010) Time-dependent regulation of yeast glycolysis upon nitrogen starvation depends on cell history. IET Syst Biol 4: 157-168.
