# Supplementary material for: Testing Biochemistry Revisited: How In Vivo Metabolism Can Be Understood from In Vitro Enzyme Kinetics
Source: PLoS Comput Biol. 2012 Apr 26;8(4):e1002483. doi: 10.1371/journal.pcbi.1002483 (PMC3343101; doi:10.1371/journal.pcbi.1002483)
Supplement: Table S15 — Flux Control Coefficients, D = 0.35 h−1, 4 h nitrogen-starved. (PDF) [file pcbi.1002483.s015.pdf]

**Table S15 Flux Control Coefficients,  $D = 0.35 \text{ h}^{-1}$ , 4h nitrogen-starved.**

The control of the flux  $J$  through an enzyme  $j$  (rows) exerted by an enzyme  $i$  (columns). The control coefficient

$$C_i^j = \frac{dJ_j}{dV_{\max,i}} \cdot \frac{V_{\max,i}}{J_j} = \frac{d \ln J_j}{d \ln V_{\max,i}} \approx \frac{\ln J_{j,+h} - \ln J_{j,0}}{\ln V_{\max,i,+h} - \ln V_{\max,i,0}}$$

was approximated by increasing the  $V_{\max}$  of the

enzyme of interest by  $h$ , which was 1%. This was done for the model versions corresponding to figure 2 in the main text.

[illegible]
